# Supplementary material for: Impact of present aircraft NO x and aerosol emissions on atmospheric composition and climate: results from a model intercomparison
Source: Copernicus journal article supplement (doi:10.5194/egusphere-2025-4273), 2025-09-15
Supplement: Supplementary file [file egusphere-2025-4273-AC2-supplement.pdf]

## Author response to Referee 2

We kindly thank the referees for their relevant comments, suggestions, and corrections.

The responses are organized as follows: the reviewer's comment is in blue, our answers are in black, and the changes proposed for the revised manuscript are in italics (black for modified sentences, grey for unchanged sentences that have been copy-pasted here to remind the context). The numbering of the pages and lines corresponds to the preprint, not to the modified document. Last, we answer "Done" to all the comments suggesting a modification that we completely agree with, and that do not require any clarification in this document.

Before addressing the review itself, we have to highlight the update of the results since the preprint submission, as we made a small error on the radiative forcing calculation, more precisely on methane feedback: we computed the latter accounting for the decrease of methane lifetime due to reaction with OH, but we forgot to include the stratospheric loss and soil deposition.

In the abstract, the previous statement:

*"The  $\text{NO}_x$  net ERF is systematically positive and ranges from 7.3 to 22.1  $\text{mW m}^{-2}$  among the different models (14.1–22.1  $\text{mW m}^{-2}$  without the least sensitive model)."*

has been changed into:

*"The  $\text{NO}_x$  net ERF is systematically positive with a model mean of 18.3  $\text{mW m}^{-2}$ , ranging from 9.4 to 24.5  $\text{mW m}^{-2}$  among the different models. This net  $\text{NO}_x$  forcing is reduced by 35% and 43% accounting for the negative forcing arising from the formation of nitrate and sulfate particles, respectively."*

Radiative forcings related to  $\text{NO}_x$  in Table S6 have been corrected as follows (the short-term  $\text{NO}_x$  effect on ozone has also been updated, but it is smaller than 0.2  $\text{mW m}^{-2}$ ):

| ERF ( $\text{mW m}^{-2}$ )  | EMAC- $\text{NO}_x$ | LMDZ-INCA   | MOZART3 | OsloCTM3 | GEOS-Chem |
|-----------------------------|---------------------|-------------|---------|----------|-----------|
| <b>Former results</b>       |                     |             |         |          |           |
| Short-term ozone            | 27.7                | 43.0 [40.6] | 42.0    | 34.0     | 56.0      |
| $\text{CH}_4$ direct effect | -13.2               | -17.1       | -12.9   | -12.9    | -24.8     |
| Long-term ozone             | -5.37               | -6.96       | -5.24   | -5.24    | -10.1     |

|                                |       |       |       |       |       |
|--------------------------------|-------|-------|-------|-------|-------|
| Stratospheric H <sub>2</sub> O | -1.74 | -2.25 | -1.70 | -1.70 | -3.26 |
| Total CH <sub>4</sub>          | -20.4 | -26.4 | -19.9 | -19.9 | -38.2 |
| Total                          | 7.37  | 16.7  | 22.2  | 14.1  | 17.9  |

---

### New results

---

|                                |       |             |       |       |       |
|--------------------------------|-------|-------------|-------|-------|-------|
| Short-term ozone               | 27.6  | 43.0 [40.6] | 42.2  | 33.8  | 56.0  |
| CH <sub>4</sub> direct effect  | -11.9 | -15.4       | -11.5 | -11.6 | -22.0 |
| Long-term ozone                | -4.83 | -6.24       | -4.68 | -4.73 | -8.93 |
| Stratospheric H <sub>2</sub> O | -1.56 | -2.02       | -1.51 | -1.53 | -2.89 |
| Total CH <sub>4</sub>          | -18.3 | -23.6       | -17.7 | -17.9 | -33.8 |
| Total                          | 9.36  | 19.4        | 24.5  | 15.9  | 22.2  |

We also added further information on the calculation of radiative forcings, in Section 2.3:

*“To derive the radiative impact of aviation-induced atmospheric composition changes, we use concentration-based kernels to calculate the stratospherically adjusted ozone RF and the instantaneous top-of-the-atmosphere RF due to aerosol–radiation interactions (Skeie et al., 2020; Samset et al., 2011). To perform the RF calculations, ozone and aerosol data from all models were interpolated to the kernel resolution (2.25° x 2.25° and 60 vertical levels). For the calculation of the ozone column for each model, the air mass from OsloCTM3 was used, following the method in Skeie et al. (2020). The ozone RF calculations from the kernel have been found to compare favorably against offline radiative transfer model calculations in LMDZ-INCA and OsloCTM3. More generally, kernel-based estimates of ozone RF have been found to agree with those from full radiative transfer in previous applications (Lund et al., 2021). The change in methane volume mixing ratio and the associated radiative forcing are calculated based on the modelled change in methane total lifetime for each simulation. It assumes, in addition to the methane oxidation by OH, a stratospheric sink characterized by a 120-year lifetime and a soil sink characterized by a 160-year lifetime. This calculation is combined with the methane feedback factor (referring to the CH<sub>4</sub> feedback on its own lifetime) and an emission non-steady state factor, method described in Berntsen et al. (2005), Hodnebrog et al. (2012) and Terrenoire et al. (2022). The methane reference mixing ratio is fixed to 1834 ppb. The methane feedback factor (f=1.45) is taken as the model mean from a recent model intercomparison (Sand et al., 2023). We use a non-steady state factor to correct for the fact that due to its long lifetime, methane steady state is not reached, such as assuming steady-state to derive the radiative forcing overstates the response (Grewe and Stenke, 2008). This non-steady factor was recently recalculated by Bellouin et al. (in prep.) to be 0.680 for present-day conditions. From this methane mixing ratio change, the methane RF is calculated*

using the simplified equation from Etminan et al. (2016). The indirect long-term ozone and stratospheric water vapour RFs are calculated based on the change in methane mixing ratio adopting the normalized forcings from a recent model intercomparison (Sand et al., 2023). For long-term ozone we use a normalized forcing of  $0.180 \text{ W m}^{-2} \text{ ppbCH}_4^{-1}$  and, for stratospheric water, a normalized forcing of  $0.058 \text{ W m}^{-2} \text{ ppbCH}_4^{-1}$ .

The calculated ozone and methane RFs are converted to ERFs based on the efficacies provided by Lee et al. (2021) (1.370 for the short-lived ozone forcing and 1.180 for the methane direct and indirect forcings). For aerosols, the kernel includes rapid adjustments for BC, thus representing the ERF, while the ERF/RF ratio is assumed to be 1.0 for the scattering aerosols due to lack of other information (Lee et al., 2021).”

Another clarification has been added at the end of the paragraph on aerosol RFs commenting Fig. 11:

“[...] The RFs shown in Fig. 11 and discussed in this section are converted to ERFs to enable comparison with other studies in the following paragraphs (see Sect. 2.3). It is worth noting that in our modelling set-up, the nitrate particles forcing is not only related to aircraft  $\text{NO}_x$  emissions driving the formation of ammonium-nitrate particles ( $\text{NH}_4\text{NO}_3$ ). It is also affected by the oxidation of sulfur dioxide ( $\text{SO}_2$ ) into sulfate particles due to  $\text{NO}_x$ -induced OH formation. This additional sulfate then collides with ammonia to form ammonium-sulfate ( $(\text{NH}_4)_2\text{SO}_4$ ) particles, thus competing with nitric acid to react with ammonia and thus to form nitrate aerosol. Terrenoire et al. (2022) show that the nitrate forcing is more negative (or less positive) when one accounts for the aircraft  $\text{NO}_x$  effects on aerosols. With this limitation in mind, we note that the nitrate forcing would reduce the net  $\text{NO}_x$  forcing from a model mean forcing of  $18.3 \text{ mW m}^{-2}$  to  $11.9 \text{ mW m}^{-2}$ .”

And in the conclusion:

“The net aerosol  $\text{ERF}_{\text{ari}}$  varies between  $-6.5$  and  $-17.8 \text{ mW m}^{-2}$  (multi-model mean of  $-11.6 \text{ mW m}^{-2}$ ), with the formation of sulfate and nitrate particles that reduces the net  $\text{NO}_x$  forcing by 43 % and 35 %, respectively.”

Concerning the introduction, we also point out the division of the second (and long) paragraph into two smaller paragraphs: one more general for the non- $\text{CO}_2$  emissions, and the second one more specific on the consequences of aviation  $\text{NO}_x$ .

Last, in the end, six figures have been added into the Supplement, both from the reviewers’ suggestions (Figs. S6, S9, S11–S13), and from our own initiative, as we found it would be useful for the reader (Fig. S7).

---

The manuscript presents a new model intercomparison to quantify the impact of  $\text{NO}_x$  and aerosols emissions from aircraft on both atmospheric composition and climate. The

atmospheric composition piece includes ozone, NO<sub>x</sub>, OH and aerosols – black carbon, sulfate and nitrate aerosols. The study includes three global chemistry transport models – MOZART3, OsloCTM3, GEOS-Chem – and two global chemistry climate models – EMAC, LMDZ-INCA. The authors found that aircraft NO<sub>x</sub> emissions are causing an increase of ozone photochemical production in the free troposphere throughout the year and a decrease of ozone chemical loss in the high-latitude lowermost stratosphere in spring/early summer. They also found that the net Effective Radiative Forcing (ERF) of NO<sub>x</sub> due to aircraft emissions is positive and vary with models between 7.3 to 22.1 mW m<sup>-2</sup>, when the aircraft aerosol direct ERF is negative and vary between -6.5 and -17.8 mW m<sup>-2</sup>.

The authors put in perspective their findings with prior studies and discuss the potential reasons of the uncertainties. They suggest ways to improve future model output to reduce those uncertainties.

The study is in the scope of ACP. It is a thorough study. The manuscript is well written and well organized with clear figures and tables.

I would support publication after the authors addressed the minor comments I listed below.

#### General Comments:

The manuscript would benefit from having a description of the aviation emission inventories used in this study: CEDS aviation emissions and Flightradar24, which could include the altitude of injection. Could the authors add a map of the aircraft NO<sub>x</sub> emissions?

We totally agree with this suggestion. We added the partial columns of seasonal NO<sub>x</sub> emissions in Supplement, Fig. S9, summed up between 150 and 400 hPa.

The authors do compare their results with former studies but it is not always clear when the study brings new findings on the impact of aircraft emissions on atmospheric composition and climate. Does this study bring to the community more accurate numbers with less uncertainties or new numbers and how (e.g. the impact of nitrate aerosols, the intensity of the direct effect of aerosols from aviation)? Could the authors write a separate section on this point? The section could also discuss the choice of the time-period and its potential impact on the results.

We totally agree with this important suggestion, made by both reviewers.

As written in the response to Referee 1, we added some additional remarks, as follows:

- In the introduction, in the third (formerly second) paragraph, we clarified two points addressed by our study, about the estimates from Lee et al. (2021). One concerns the formation of aerosols due to aircraft NO<sub>x</sub>, and the other one concerns the

heterogeneity of the studies reviewed by Lee et al. (2021), which is a strategy different than ours as it synthesizes 60 estimates taken from 20 studies.

*“[...] Since methane is an ozone precursor in the troposphere and a water vapor precursor in the stratosphere, its increased sink in the short term decreases the production of these two species during the decade following the emission, thus increasing the cooling term due to methane destruction (e.g. Myhre et al., 2011). Through the production of tropospheric OH, aircraft NO<sub>x</sub> also promotes the formation of sulfate and nitrate (NO<sub>3</sub>) particles (because of an enhanced oxidation of SO<sub>2</sub> and NO<sub>x</sub>), thus acting as an additional cooling factor (Brasseur et al., 2016; Terrenoire et al., 2022). Based on the existing literature, Lee et al. (2021) estimated the net aviation NO<sub>x</sub> impact to be an effective radiative forcing (ERF) of 17.5 [0.6–28.5] mW m<sup>-2</sup> for the year 2018, resulting from a positive ERF from short-term ozone of 49.3 [33–76] mW m<sup>-2</sup> and a negative ERF from long-term methane decrease of -34.9 [-65 – -25] mW m<sup>-2</sup>, thus highlighting high uncertainties for both processes. However, Lee et al. (2021) do not account for the NO<sub>x</sub> effect on aerosol formation, as they point out the limited number of studies on this topic and the large associated uncertainties. Also, the assessment by Lee et al. (2021) is based on an important set of modelling studies which have been harmonised regarding time periods and aircraft emissions in order to account solely for inter-model differences in both chemistry and radiation. In this study we revisit the aircraft NO<sub>x</sub> perturbations on chemistry and climate based on the latest generation of five global chemistry-climate/transport models and on a common modelling protocol regarding surface and aircraft emissions and time period covered. This further reduces the need for harmonisation of the model results as a post-treatment and allows to focus on the inter-model differences in the treatment of chemistry and dynamics.”*

- In the introduction, at the end of the fourth paragraph, formerly the third, which reviews the literature:

*“[...] processes not accounted for, as in Brasseur et al. (2016). The latter study also shows the impact of aircraft on gaseous and aerosol species, but not necessarily with the same models, thus limiting the interpretation of the results. Last, the aviation impact on nitrate aerosol is relatively new in the literature, and most of all, there is no intermodel comparison regarding its perturbation due to aircraft emissions.”*

- In the introduction, at the end of the 5<sup>th</sup> (formerly 4<sup>th</sup>) paragraph, we chose a more affirmative formulation regarding our explanation for the spatial pattern of the ozone perturbation:

*“The objectives of this study are (1) to provide an overview of the methodology of the harmonized multi-model study, (2) to present aviation-induced changes in the concentration of reactive species and the extent to which models agree, as well as specific differences between individual models, including an evaluation of the linearity of aviation induced effects. Thanks to the ancillary variables provided by two of the models, our intercomparison is the first to suggest an explanation for the pattern of ozone changes in response to aircraft*

*NO<sub>x</sub>. Finally, (3) to provide estimates of the radiative effects of the simulated aviation-induced ozone, methane, and aerosol changes.”*

This sentence replaces the former one:

*“Based on ancillary variables provided by some of the models, we suggest additional explanations for the model results.”*

- In the summary and conclusions section, first paragraph:

*“In light of increasing air traffic, we perform and document a new multi-model assessment of the atmospheric composition response to aviation NO<sub>x</sub> and aerosol/aerosol precursors emissions, and the associated radiative forcing of climate, notably providing the first intermodel comparison on the impact of aviation on nitrate aerosol. The purpose is to refine estimates of the impact of aviation by limiting differences between the models in their implementations, for a better understanding of the intermodel variability in the results. We present a model intercomparison involving five state-of-the-art chemistry-transport models (CTM) or chemistry-climate models (CCM). For this study, each participating model provides a set of present-day runs, including at least one reference run with all the anthropogenic emissions, and one perturbation run without aviation emissions, using the same anthropogenic and biomass-burning emission inventories. The models used to estimate the impact of aviation-induced aerosols are also involved for the gaseous phase, thus maximizing consistency between the estimates for gaseous and aerosol species. For all models, the effective radiative forcings are calculated with the same radiative code, the same grid, and the same feedback factors.”*

- Same section, second paragraph:

*“With the same common protocol we applied to the models, our net NO<sub>x</sub> ERF estimate and range, as well as the relative distribution between individual contributions from ozone, methane, and water vapor changes to the net NO<sub>x</sub> ERF, remain similar to previous studies (normalized to present-day emissions).”*

#### Specific Comments:

L.257: “CEDS aviation emissions” - Could the authors comment on the aircraft emissions inventory? Does it include altitude of injection?

Yes, the mass density of emitted pollutants is distributed onto constant pressure levels in the inventory. Each model then interpolates it onto its own grid. The mention of the injection altitude has been added at the first mention of aviation emissions in CEDS:

*“The historical anthropogenic emissions are taken from the Community Emissions Data System inventory CEDSv2 (McDuffie et al., 2020; O’Rourke et al., 2021, regarding NO<sub>x</sub>, SO<sub>2</sub>, and BC emissions), which resolves aviation emissions with 25 vertical levels (or injection heights) from the surface up to 15 km.”*

Would it be possible to add in the Supplement, the equivalent of Figure S1 but with the aircraft NO<sub>x</sub> emissions?

Maps (partial columns) and zonal cross sections of aviation emissions are now represented in Figs. S7 and S8, respectively. We added the reference to these figures to make it visible.

L.260: “small” - Could the authors give a quantity?

If we compare the total anthropogenic emissions from three scenarios (SSP1-2.6, SSP2-4.5, SSP3-7.0), we get the following NO<sub>x</sub> emissions, in TgNO<sub>2</sub>:

| Year | SSP1  | SSP2  | SSP3  |
|------|-------|-------|-------|
| 2015 | 153.7 | 154.3 | 157.3 |
| 2016 | 151.8 | 153.0 | 159.0 |
| 2017 | 150.0 | 151.8 | 160.8 |
| 2018 | 148.1 | 150.5 | 162.5 |

The values provided in the source (SSP database, link below) only concern the years 2015 and 2020, so the values for 2016–2018 listed above are derived from a linear interpolation.

The mean values, once converted into TgN/yr, are respectively 48.0, 48.5, and 50.9, thus with a maximum difference of 5.7 %.

Source: SSP database, <https://tntcat.iiasa.ac.at/SspDb/dsd?Action=htmlpage&page=50>

It has been clarified in the text:

*“For these years (2015–2018), the differences between the scenarios remain small (less than 6 % for NO<sub>x</sub>), as are the differences with [...]”*

L.274: “Flightradar24” – As for CEDS aviation emissions. Could the authors describe it more – because it is a key component of the study: altitude of injection, latitude/longitude? A paragraph dedicated to aircraft emission inventories as input for the models used in the study would be key.

A more complete representation of the emissions is now available, in Figs. S6–S8 in Supplement. The comparison between CEDS and Flightradar24 shows substantial differences in Figs. S7 and S8, notably with less emissions over North America and North Atlantic and more emissions over Asia, as explained below:

*“Among the five models included in this paper, GEOS-Chem data is from pre-existing runs made for a different publication (Quadros et al., 2025) and is thus less consistent with the protocol. For this model, the monthly-averaged aircraft emissions are calculated from a list of flights provided by Flightradar24, as described by Quadros et al. (2022). For each*

combination of aircraft type, origin and destination in the database, 3-d gridded fuel burn is calculated using a time-in-mode approach for landing-and-takeoff operations (Stettler et al., 2011) and the Base of Aircraft Data (BADA) 3.15 aircraft performance model for climb, cruise and descent phases of flight (Mouillet, 2019). Great-circle trajectories between airports are used, with a lateral inefficiency factor based on Seymour et al. (2020) applied to adjust for additional fuel used in actual trajectories. Constant cruise flight levels are used, with aircraft type specific values determined from a subset of flights for which Flightradar24 provided altitude at the start of cruise, based on ADS-B data. Emissions are calculated alongside with fuel burn using the Boeing Fuel Flow Method 2 (Baughcum et al., 1996), the FOA4 method for non-volatile particulate matter (ICAO, 2020, last access: April 2020), and data from the International Civil Aviation Organization (ICAO) Engine Emissions Databank (last access: Jan. 2021).

*The difference between Flightradar24 and CEDS emissions is well visible in the maps shown in Fig. S9 in Supplement, with less NO<sub>x</sub> emitted in West hemisphere and more in East hemisphere with Flightradar24. In terms of altitude, Figure S10 shows a continuum in the vertical distribution in CEDS emissions (at 9–11 km) but two distinct peaks with Flightradar24, the most important at 10 – 11 km (as with CEDS) and a secondary peak at 8 – 9 km, lower than most emissions in CEDS. Also, the runs concern only the year 2019.”*

L.301-306 (a): Does the rescaling methodology implies that the vertical regridding for each model has been made with LMDZ-INCA grids as the reference? Could you clarify?

We realize that our formulation using “regridding” is confusing. The perturbations in chemical tracers have been calculated on each model’s original grid. The radiative forcings however have been computed after a regridding onto OsloCTM3’s to apply the same kernel resolution.

When we used the word “regridding” just before, it was in a context upwind from the simulations: for each model, the emission files have to be interpolated onto the model’s grid.

We rephrased as follows:

*“As the aviation emissions provided as output by the models can be slightly different due to vertical regridding to model native resolutions and/or due to different years, we apply a rescaling factor to each model result to ensure the same amount of aircraft emissions. For a given model M, [...]”*

*“The aviation emissions provided as output by the models can be slightly different for two reasons. First, the regridding of the emission files to the model native resolutions, which are all different. Second, the differences in the simulation years. For this purpose, we apply a rescaling factor to each model result to ensure the same amount of aircraft emissions. For a given model M, [...]”*

Concerning the averaging kernels, we clarified as follows:

*“To perform the RF calculations, ozone and aerosol data from all models were interpolated to the kernel resolution (2.25° x 2.25° and 60 vertical levels, i.e. that of OsloCTM3).”*

L.301-306 (b): Have the authors estimated the impact of the linear rescaling on GEOS-Chem’s results?

Unfortunately not. For this purpose, we would need to perform a new run with GEOS-Chem for the right period (2014–2018), and then to compare. On the contrary, we use a pre-existing run to avoid performing a new one.

L.323-324: Could the authors be more explicit on the calculation of the impact by explaining the ratio:  $\Delta S/EN_{Ox}$  with  $\Delta S$  the perturbation. How this perturbation is calculated? How  $EN_{Ox}$  is calculated?

We clarified the formalism used for the calculations by adding new equations (2, 3a, 3b, and 4) at the beginning of Section 3.

L.325-327: Where is the reference figure or table for the percentages (e.g. global  $NO_x$  perturbation ranges of emitted  $NO_x$  in terms of nitrogen mass).

These numbers are directly taken from Table 4. Where we can see a  $\Delta NO_x$ -to- $EN_{Ox}$  ratio of  $0.006 \text{ TgN}/(\text{TgN yr}^{-1})$ , we say it is 0.6 % of the mass of emitted  $NO_x$  during the year. We added a few clarifications to make it explicit:

*“As seen in Table 4, the global  $NO_x$  perturbation ranges between 0.60 % (EMAC- $NO_x$ ) and 0.85 % (MOZART3) of the yearly emitted  $NO_x$ , in terms of nitrogen mass.”*

L.327-328: “0.51 DU” – shouldn’t the unit be DU/NEU? / “0.90 DU” – shouldn’t it be 0.92 DU/NEU (number reported in Table 4)? / “9.9 TgO<sub>3</sub>” – shouldn’t it be 10 Tg/NEU (number reported in Table 4)?

Yes, thanks to Referee 2 for pointing out this inconsistency. It has been corrected.

L.329: Would the authors have a reference figure or table for mixing ratios?

We realize that the sentence L329 is confusing (as it is not the reference mixing ratio but the perturbation in mixing ratio that can reach higher values with EMAC- $NO_x$  than OsloCTM3), so we propose the following precision:

*“The values are similar between LMDZ-INCA and MOZART3. OsloCTM3 shows a higher mean sensitivity compared to EMAC- $NO_x$  though the perturbation for EMAC- $NO_x$  mixing ratio reaches higher values (as seen later, in Fig. 5), which is due to the lower altitude of the OsloCTM3 response (hence a greater mass perturbation) and to its wider vertical range.”*

We did not want to mention Figure 5 as we tried to avoid the reader going forth and back in the manuscript, but in the end, it might not be possible to avoid it totally.

L.330: “lower altitude of the OsloCTM3” – Could the author explain this characteristic in the method section? / “wider vertical range” - Could the width of the vertical range be added in Table 1?

We are not sure to understand Referee 2 on this question. The “wider vertical range” is a description of the results shown in a figure, not a method. As for the lower altitude of the ozone response for OsloCTM3.

L.332 a): ”AEDT” – Could the authors spell it out?

We spelled it out in the manuscript. It means Aviation Environmental Design Tool, provided by the Federal Aviation Administration (FAA).

L332 b): "between 2.8 and 11.2 Tg/(TgN.yr-1) from both offline and online models” – How these models compare with the CTMs of the study (emission inventories, chemical and physical processes)?

The chemical processes are similar, except for the nitrate chemistry, which has been further developed over the last 10 years. Concerning the emission inventories, they are similar to CEDS too, for aviation.

According to Olsen et al. (2013), the present-day (2006) non-aviation emissions are taken from RCP (Representative Concentration Pathway) 4.5, whereas our study imposes a complete and self-consistent emission inventory (CEDS).

L.334 a): “9.9” – wouldn’t be 10 Tg/NEU instead, according to Table 4?

Yes, we corrected this inconsistency.

L334 b): “The ozone sensitivity is lower in the current study” – Did the authors mean lower than what was found in Olsen et al. (2013) and Brasseur et al. (2016)? How ozone sensitivity is calculated? Is it different from the ozone burden sensitivity?

Yes, we mean lower than in these two studies, but only if we compare comparable things (offline models). Here, we do refer to ozone burden sensitivity, which we clarify:

*“Compared to the current study (5.6–10.0 Tg/NEU), the inter-model range is similar. The ozone burden sensitivity is lower in our results than in these two studies, [...]”*

L.335: “aviation NO<sub>x</sub> emission is 36% greater in 2014–2018 than in 2006” – Do the authors have a reference, a figure or table to show this number for aviation NO<sub>x</sub> emission change?

Yes, the emissions during 2006 are shown in Table 2 in Brasseur et al. (2016): 0.812 TgN/yr. Compared to the ENO<sub>x</sub> value in LMDZ-INCA (1.119 TgN/yr), it represents an increase of ~38 % (not 36 %). We clarified in the text:

*“[...] the aviation NO<sub>x</sub> emission is 38 % greater in 2014–2018 (1.119 NEU) than in 2006 (0.812 NEU, as shown in Table 2 from Brasseur et al., 2016), [...]”*

L.336: “GEOS-Chem is characterized by the highest response” – May be worth repeating 11.2 Tg/NEU in parenthesis here, if I correctly understand.

We agree and have added it to the text.

L.342-343: “In order to capture as much of the response for each model as possible” – Could you clarify? Could you explain the vertical range characteristics of the model and give information in Table 1 that you can refer here.

We rephrased this sentence as follows to make it clearer.

Former version:

*“In order to capture as much of the response for each model as possible, the vertical average is made between 150 and 350 hPa.”*

Last version:

*“As the models can have different altitudes in the maximum ozone response to aviation NO<sub>x</sub> emissions (as seen later for OsloCTM3 in Fig. 5), the vertical average is made between 150 and 350 hPa to capture as much of the response for each model as possible.”*

L.344: “NO<sub>x</sub> response” - It would be worth defining *NO<sub>x</sub> response*, which seems to be called *NO<sub>x</sub> change* in Figure 1. It may be worth adding a paragraph in the methodology? Worth explaining why it is a different unit than in Table 4?

“Response” is more specific than “change”. We use “response” specifically for aviation, in a way equivalent to “aviation-induced change”. We replaced most “change” occurrences by “response” in order to avoid confusion. Sometimes, we keep “aviation-induced change” as the meaning is explicit with this formulation, thus with a low risk of confusion.

As to the unit, a global budget is more conveniently expressed in burden (total mass), whereas local values are more conveniently expressed as concentrations or mixing ratios.

L.371-372: “As expected, Fig. 3 shows a more homogeneous ozone perturbation” – Do the authors mean *more homogeneous than NO<sub>x</sub>*? Could the authors explain why it is expected?

Yes, that is the exact meaning of this phrase. The text has been updated as follows:

*“Figure 3 shows a more homogeneous ozone perturbation compared to NO<sub>x</sub>, as expected for a secondary pollutant.”*

L.391: “for ozone” – Typo, “for ozone” is written twice in this sentence.

Thanks to Referee 2, we corrected this typo.

L.419: “lesser” – Could the authors specify which study gives a 16% lesser ozone response than the current study?

We added “*in the current study*” at the end of the sentence.

L.420: “weaker” - Could the authors specify which study gives a 16% lesser ozone response?

We clarified: “*still in the current study compared to Sovde et al. (2014)*”.

L.421: “perturbations” – Could the authors be specific and change to “perturbations of ozone”?

Done.

L.424: “studies that focus on the past decade” – Could the authors remind the reader of those studies by adding the references?

We clarified with the bracket ‘*(notably Sovde et al., 2014; Brasseur et al., 2016)*’.

L.431-432: It would be worth reminding the reference to Table S2 here.

Done, as follows:

*“As a consequence, Table S2 also shows that the perturbation in methane lifetime is affected by a factor of 5% [...]”*

L.435: “by EMAC-NO<sub>x</sub> and LMDZ-INCA” – Could the authors remind the readers why not by the other models?

The clarification has been introduced:

*“The causes for the spatial distribution of the ozone response have been investigated using the chemical production and loss terms for ozone from the two models that provided them as diagnostic output, i.e. EMAC-NO<sub>x</sub> and LMDZ-INCA.”*

L.440: “tends to reduce the ozone vertical gradient” – Could the authors back up this statement with a figure in the supplement?

We do not think it is worth another figure. As there is more ozone in the LMS (above) than in the UT (below), increasing ozone production in the UT tends to reduce the difference between the two layers, thus the vertical gradient.

Instead of an additional figure, we clarified with an explanation:

“First, the enhanced photochemical production in the UT tends to reduce the ozone vertical gradient (as background ozone is less abundant in the UT than above) [...]”

L.441: “Second, the chemical loss term (Fig. S2, in Supplement) increases in the UT” – The ozone loss seems to be maximum in the mid-troposphere (~ 600 hPa, Figure S2). It would be worth noting this and explain why focusing on the UT.

We agree that it can be confusing that we do not mention the maximum in the ozone loss term. We rephrased as follows:

*“Second, though the chemical loss term (Fig. S2, in Supplement) increases in the mid-troposphere as ozone increases and water vapour remains relatively abundant (thus involving the reaction  $O(^1D) + H_2O \rightarrow 2 OH$ ), the chemical loss term decreases in the high-latitude LMS during spring-early summer.”*

L.443-446: This finding is very interesting. Could the authors elaborate more on this competition between O<sub>3</sub> and NO<sub>2</sub> to react with OH? Any reference?

We agree that this point warrants further development, notably because previous studies have not investigated the reasons for this pattern in ozone (and OH) perturbations, as it was not the main purpose of these experiments.

We can cite the book “Aeronomy of the middle atmosphere” written by Guy Brasseur and Susan Solomon (at least the 2005 edition), Fig. 5.71, p. 416, as shown below. It presents zonal cross sections of the share of stratospheric O<sub>x</sub> destruction between different chemical families acting through catalytic cycles, in June, from the NASA/Goddard 2-D model. It is organized such that at a fixed location, the sum of the numbers across the 5 panels equals 100 %. Regarding our study, the area of interest is the lowermost stratosphere in the northern high latitudes. At this location, the major contributor to catalytic ozone loss is the HO<sub>x</sub> family (HO<sub>2</sub>+OH), accounting for ~80 %.

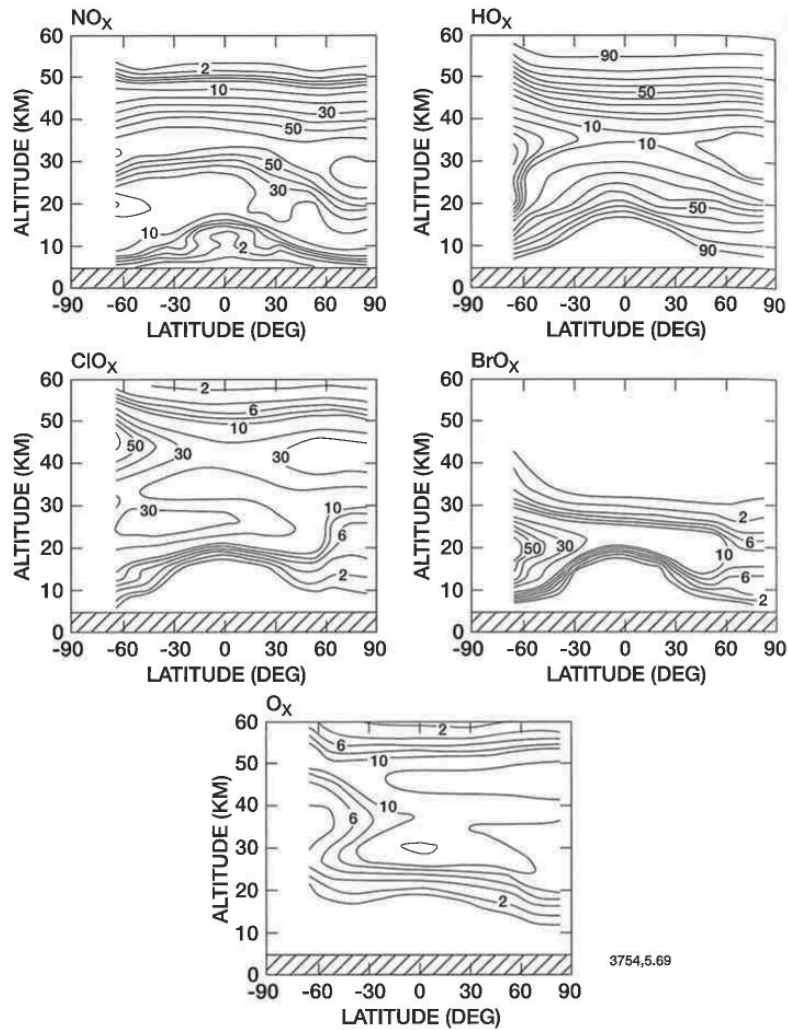

Figure 5.71. Relative contribution (percent) of various chemical families ( $\text{NO}_x$ ,  $\text{HO}_x$ ,  $\text{ClO}_x$ ,  $\text{BrO}_x$ , and  $\text{O}_x$ ) to the destruction of odd oxygen in the stratosphere in June (based on calculations by the NASA/Goddard 2-D model). Courtesy of C.H. Jackman, NASA.

We added more information in the manuscript, as follows:

“The spatial correlation with OH (Fig. 6) suggests that the ozone perturbation in the LMS is rather linked to lessened ozone destruction from the reaction  $\text{O}_3 + \text{OH} \rightarrow \text{HO}_2 + \text{O}_2$ , despite the higher springtime ozone abundance due to the Brewer–Dobson circulation (e.g. Cohen et al., 2018). At these altitudes, stratospheric ozone destruction is essentially caused by the  $\text{HO}_x$  (=  $\text{OH} + \text{HO}_2$ ) catalytic cycle (with a contribution of  $\sim 80\%$  in June, see Brasseur and Solomon, 2005), involving the reactions:

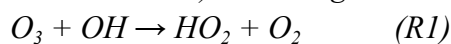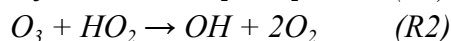

One can note that in the  $\text{HO}_x$  catalytic cycle, Reaction R2 is specific to the lowermost stratosphere, as  $\text{O}(^1\text{D})$  is too rare to make the reaction  $\text{O}(^1\text{D}) + \text{HO}_2 \rightarrow \text{OH} + \text{O}_2$  significant, contrary to the middle and upper stratosphere. Concerning the OH decrease in the LMS, we can relate it to the following reactions induced by the  $\text{NO}_x$  injection:

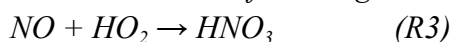

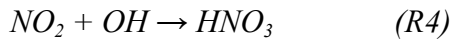

These four reactions explain that aircraft  $\text{NO}_x$  neutralizes the main ozone sink in this region. It is illustrated by enhanced  $\text{NO}_x$  levels extending into the polar LMS during the same season, and with  $\text{HNO}_3$  increasing substantially (shown in Fig. S4 in Supplement). As the primary pollutants emitted mainly in the midlatitudes have their response extending into the LMS in winter as well (BC in Fig. 8, next section;  $\text{SO}_2$  in Fig. S5, in Supplement), the wintertime confinement of the  $\text{NO}_x$  response in the midlatitudes cannot be due to transport only, which suggests a particularly short  $\text{NO}_x$  chemical lifetime compared to the poleward transport duration. During spring – summer however, part of  $\text{HNO}_3$  is photolyzed back to  $\text{NO}_x$ , which can explain the northward extension of the  $\text{NO}_x$  response after the polar night.”

L.482: “The seasonality is the same as for ozone” – The seasonality here seems to be for sulfate aerosols. What about the seasonality for black carbon and nitrate aerosols? Are Jan and Apr-Jun as relevant as for ozone and sulfate aerosols?

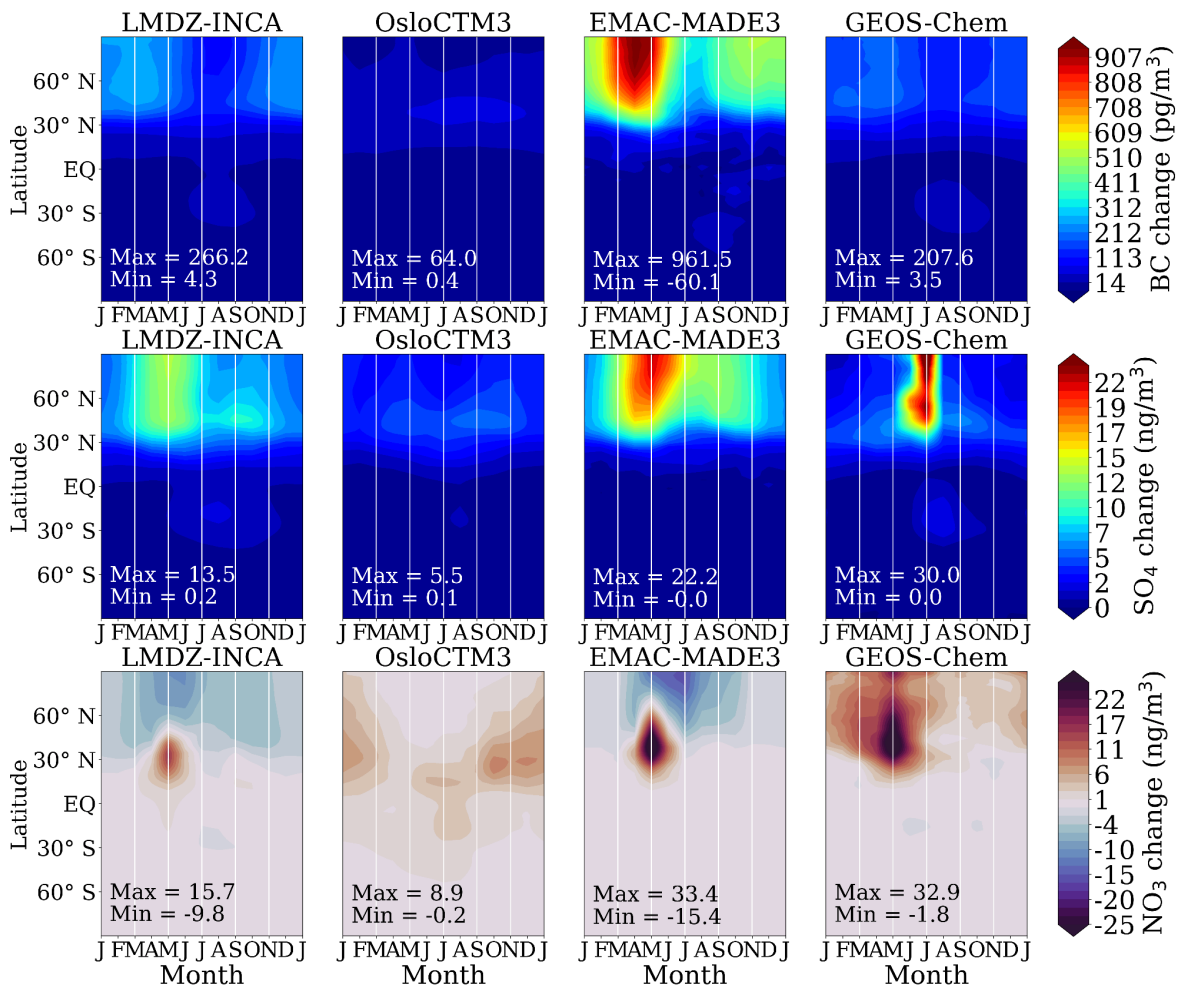

The figure above shows Hovmöller diagrams for the three aerosol species, in the UTLS. The seasonality for  $\text{SO}_4$  is different with GEOS-Chem, with a sharp but strong June-July maximum (especially July). Taking that into account, we had to slightly change our

description. For BC, the seasonality is very different than for ozone, as expected since BC is a primary species. But this kind of analysis is beyond the scope of the study, and we do not expect that the months we chose are relevant for every species. We clarified it. As to nitrate, the seasonality is commented on in the next paragraph. We readapted the paragraph as follows:

*“Four models investigated the impact of aircraft emissions on aerosols. The LMDZ-INCA and OsloCTM3 models share the common protocol, GEOS-Chem follows a similar set-up (Quadros et al., 2025), while the EMAC-aer model is represented by the output from Righi et al. (2023) with a substantially different simulation set-up (see Section 2.2). The contribution of aviation to atmospheric aerosols is shown in Figs. 8–10. It is shown for the same months as for gaseous species in a purpose of simplicity, though it is not optimal for every species. It is worth reminding that the EMAC-aer model is more accurate (as it is equipped with a detailed two-moment aerosol microphysical scheme) than the other models (characterized by simpler aerosol representations). Also, the EMAC-aer model is not used with a QCTM mode, hence the existence of negative values in BC and SO<sub>4</sub> due to changes in dynamics and physical processes. For these two species, the models generally show a maximum in the UTLS as for NO<sub>x</sub> in terms of zonal cross sections. OsloCTM3 has a much weaker response in the UTLS. For BC, all the models exhibit a local maximum at the mid-latitude surface, due to the take-off and landing phases (in Northeast America, Europe, and East Asia), and to subsidence. The LMDZ-INCA and GEOS-Chem models show similar responses, with a maximum in April. All the models except OsloCTM3 show a summertime minimum for BC. The sulfate perturbation reaches its maximum at high latitudes in May with LMDZ-INCA and EMAC-aer, and in July with GEOS-Chem (shown in Fig. S7 in Supplement). The SO<sub>4</sub> seasonality is similar with ozone, as photochemistry increases and promotes further the conversion of sulfur dioxide (SO<sub>2</sub>) into SO<sub>4</sub>, thus enhancing the formation of sulfate aerosol, as explained in Terrenoire et al. (2022) and Prashanth et al. (2022). For both BC and SO<sub>4</sub>, the EMAC-aer model has a much stronger response, in the UTLS but also in the whole free troposphere. The maximum shifts from the lower free troposphere in winter up to the UTLS in summer. Most differences between EMAC-aer and the other models are consistent as EMAC-aer is the only model including the Aitken mode in the aerosol size distribution of aircraft emissions, and with an important proportion (91 % of emitted soot, and of primary sulfate particles, as supported by observations: Petzold et al., 1999; Mahnke et al., 2024), except the sulfate maximum in GEOS-Chem (July) that reaches higher levels than EMAC-aer.”*

L.523: “fewer” – Do the authors mean “fewer than for the gas-phase”?

Yes, it is clarified now.

L.533: “surface concentrations” – Could the authors provide a figure/map in the supplement for the surface concentrations? How surface is defined in the models?

Accordingly with Referee 2's suggestion, these new figures have been added in Supplement (Figures S11–S13), and we filtered the “non-significant” gridcells for EMAC-aer, which removed some very high values mentioned in the preprint (for BC and NO<sub>3</sub>). The corresponding paragraph has been modified as follows:

*“It is worth mentioning the aviation impact on surface concentrations as represented by these models, shown in Figs. S11–S13. The surface is represented by the lowermost level (up to ~60 m, 70 m, 20 m, and 130 m for EMAC-aer, LMDZ-INCA, OsloCTM3, and GEOS-Chem respectively). As in Righi et al. (2023), we performed a t-test on EMAC-aer output in order to assess the significance of the perturbation against the interannual variability. We choose to show only the gridcells where the perturbation is characterized by a p-value lesser than 0.05, consistently with Righi et al. (2023). On average in the period of interest, the BC seasonal maxima at the surface are located at the eastern and western coasts of the US, in Europe, and, to a lesser extent, in East Asia (Fig. S11). These maxima are generally at ~1 ng m<sup>-3</sup> except for EMAC-aer, which maxima reach ~ 4 ng m<sup>-3</sup> in the eastern US, Europe and around the Mediterranean basin. The increase in the other two aerosol compounds is more significant. SO<sub>4</sub> perturbation takes place in western Europe, US, and the subsidence regions as North Africa–Middle East with a summertime average of ~35–45 ng m<sup>-3</sup> (70–90 ng m<sup>-3</sup> for EMAC-aer). For NO<sub>3</sub>, the impact is generally stronger in winter in North America, western Europe, South Asia, and East Asia. The latter reaches wintertime NO<sub>3</sub> perturbations of 100–460 ng m<sup>-3</sup>. As for the UTLS, the differences between EMAC-aer and the other models are large, which suggests an important sensitivity of both climate and air quality impacts to the size of emitted aerosols (as discussed in Gettelman and Chen, 2013; Righi et al., 2013), and highlights the need for another model intercomparison with a more accurate aerosol parameterization in the model ensemble.”*

L.639: “not modeled here” – Could the authors explain why they did not model “contrail cirrus formation”?

The inclusion of process-based contrail cirrus parametrisations in global climate models is a relatively new development, only available in a couple of models, in configurations specific to this purpose (Lee et al., 2021). The models and versions we use do not have the capability of quantifying the contrail cirrus effects. This has been updated in the text: *“Lastly, the other major component of the ERF from aviation emissions is contrail cirrus formation, which could not be simulated within the current capability of the models used in this study. Lee et al. (2021) estimated...”*

L.686-688: This is an important statement and seems to deserve being highlighted in the abstract.

We agree with Referee 2, and we added this statement to the abstract, as follows:

*“Estimates of the aerosol direct ERF are systematically negative and range between -6.5 and -17.8 mW m<sup>-2</sup>, compensating most of the net NO<sub>x</sub> ERF though with noticeable intermodel differences arising from the diversity in aerosol parameterizations.”*
